# Supplementary material
Source: Elsevier journal article supplement (https://www.sciencedirect.com/science/article/pii/S0213911123000122)
Supplement: mmc1 [file S0213911123000122:mmc1.pdf]

|                      |                                                                                                                     |                                                                                                                                                                                   |                                                                                                                                                               |                                                                                                                                                                                    |                                                                                                                                                                                                                                |
|----------------------|---------------------------------------------------------------------------------------------------------------------|-----------------------------------------------------------------------------------------------------------------------------------------------------------------------------------|---------------------------------------------------------------------------------------------------------------------------------------------------------------|------------------------------------------------------------------------------------------------------------------------------------------------------------------------------------|--------------------------------------------------------------------------------------------------------------------------------------------------------------------------------------------------------------------------------|
| Obesity              | BMI ≥30 kg/m2 from self-reported height and weight                                                                  |                                                                                                                                                                                   |                                                                                                                                                               |                                                                                                                                                                                    |                                                                                                                                                                                                                                |
| Hypercholesterolemia | Answered “Yes” to the question “Has your doctor ever told you that you suffer from Hypercholesterolemia?”           | Answered “Yes” to at least one of the questions “Have you ever suffered from Hypercholesterolemia?” or “Has your doctor ever told you that you suffer from Hypercholesterolemia?” | Not assessed                                                                                                                                                  | Answered “Yes” to at least one of the questions “Have you ever suffered from Hypercholesterolemia?” and “Has your doctor ever told you that you suffer from Hypercholesterolemia?” |                                                                                                                                                                                                                                |
| Diet                 | Consumption of fruit, meat, cold meat, fish, vegetables, legumes, milk and derived, pastries                        |                                                                                                                                                                                   |                                                                                                                                                               |                                                                                                                                                                                    |                                                                                                                                                                                                                                |
| Sedentarism          | Answered "I don't do any exercise" to the question "What type of physical activity do you do in your leisure time?" | Answered "I don't do any exercise" to the question "Which of these options describes better the frequency of your leisure-time physical activity?"                                | Answered "No, I don't usually do physical activity" to the question "Do you do physical activity in your leisure time such as walking, sport, gymnastics...?" | NA                                                                                                                                                                                 | Answered "I don't do any exercise" to the question "Which of these options describes better the frequency of your leisure-time physical activity?"                                                                             |
| Alcohol consumption  | Not assessed                                                                                                        | Answered "Yes" to the question "Have you drink alcohol in the last 12 months?"                                                                                                    |                                                                                                                                                               |                                                                                                                                                                                    | Answered "Daily, 5-6 times per week, 3-4 times per week, 1-2 times per week, once per month, less than one per month" to the question "In the last 12 months, what was the frequency of your alcohol consumption of any type?" |
| Tobacco consumption  | Answered “Yes, daily” or “Yes, but not daily” to the question “Are you a current smoker?”.                          |                                                                                                                                                                                   |                                                                                                                                                               |                                                                                                                                                                                    |                                                                                                                                                                                                                                |
